# Supplementary material
Source: PubMed Central journal article supplement (PMC4325095)
Supplement: JB.02464-14_zjb999093502so1.pdf [file JB.02464-14_zjb999093502so1.pdf]

**Table S1: RT-qPCR primers.**

| Gene        | Primers <sup>a</sup> | Sequence (5' → 3')    | Product location <sup>b</sup> | Product length (bp) | Annealing temperature (°C) | PCR efficiency <sup>c</sup> |               |
|-------------|----------------------|-----------------------|-------------------------------|---------------------|----------------------------|-----------------------------|---------------|
|             |                      |                       |                               |                     |                            | Liquid media                | Solid media   |
| <i>rpfA</i> | rpfAF                | GAGTCCGGCGGCAACTGGTC  | +160 to                       | 133                 | 61                         | 1.014 ± 0.022               | 1.020 ± 0.023 |
|             | rpfAR                | GCTGGGACTTGCTCGCCTGG  | +292                          |                     |                            |                             |               |
| <i>rpfB</i> | SCO3150F             | AGTACGGCGGTCTGGACTA   | +1220 to                      | 111                 | 60                         | N/A                         | N/A           |
|             | SCO3150R             | CTTATCTGCTGGGAGCGACT  | +1330                         |                     |                            |                             |               |
| <i>rpfC</i> | SCO3098F             | GGCTCTACCAGTTCGACTCC  | +236 to                       | 61                  | 57                         | 1.045 ± 0.027               | 1.057 ± 0.029 |
|             | SCO3098R             | TGCGCACGTAGAGCTTCTG   | +296                          |                     |                            |                             |               |
| <i>rpfD</i> | SCO0974F             | GTTTCGTACGGCTACCAGGTG | +1079 to                      | 90                  | 60                         | 1.041 ± 0.034               | 1.054 ± 0.038 |
|             | SCO0974R             | GTCCGCTCTTCACGGAGAT   | +1168                         |                     |                            |                             |               |
| <i>rpfE</i> | SCO7458F             | ACCGGCAACGGCTACTAC    | +199 to                       | 147                 | 66                         | N/A                         | N/A           |
|             | SCO7458R             | CATCCCCTGCAGACGGG     | +345                          |                     |                            |                             |               |

<sup>a</sup> Forward and reverse primers are denoted with letters F and R, respectively.

<sup>b</sup> Nucleotide sites are numbered relative to the start codon.

<sup>c</sup> Values are presented as mean ± standard deviation.

**Table S2. Oligonucleotides used in this study**

| Primer name           | Sequence (5' – 3')                                           | Function                                                |
|-----------------------|--------------------------------------------------------------|---------------------------------------------------------|
| SCO0974 F             | GGCACCGCCGGTATCAGCCGAACA                                     | Disruption of <i>rpfD</i>                               |
| SCO0974 R2            | GCTGCTGCTCGTCTGCCGTCTTCC                                     | Disruption of <i>rpfD</i>                               |
| SCO0974 up            | AGTGCTCATTGGGTGGCTC                                          | <i>rpfD</i> complementation and disruption confirmation |
| SCO0974 down          | CAGGTGATACCGGCGAGTG                                          | <i>rpfD</i> complementation and disruption confirmation |
| SCO3097FWD            | CAGCTCACCTCGCAGGCGTCCGGTGAGGGGATCAACCATGATTCCGGGGATCCGTCGACC | <i>rpfA</i> knockout                                    |
| SCO3097REV            | CACGCACCGGGGCGGGAGTCACGGGACCGCCCGCTTATGTAGGCTGGAGCTGCTTC     | <i>rpfA</i> and <i>rpfA/C</i> knockout                  |
| SCO3098FWD            | CCGCGTGGTCCCGCTCGTCTTGTGAAAGGTCTGTCGCATGATTCCGGGGATCCGTCGACC | <i>rpfC</i> and <i>rpfA/C</i> knockout                  |
| SCO3098REV            | GGGACATACGGTCTCTAACCGTGACCGGAACCTCCTCTATGTAGGCTGGAGCTGCTTC   | <i>rpfC</i> knockout                                    |
| SCO3098 up            | CGTGATCTGCGCGGCATGAAC                                        | <i>rpfC</i> knockout confirmation                       |
| SCO3098 int           | GCAGGCCGCCGTAGTACC                                           | <i>rpfC</i> knockout confirmation                       |
| SCO3150FWD            | CTGGGGGCCCGATCGGGACCCCTGGAGCGTGTGGGCGTGATTCCGGGGATCCGTCGACC  | <i>rpfB</i> knockout                                    |
| SCO3150REV            | GCTCACCCCGCAAGAGTAGCCGGGGCCGGGCGGCTCATGTAGGCTGGAGCTGCTTC     | <i>rpfB</i> knockout                                    |
| 3150 up               | TTCAAGAACGCCAGAACCTG                                         | <i>rpfB</i> knockout confirmation                       |
| 3150 down             | ACCGTGTGGCGTCGATGAC                                          | <i>rpfB</i> knockout confirmation                       |
| 3150 internal         | AGCAGTTCACCTCACGTCGTC                                        | <i>rpfB</i> knockout confirmation                       |
| SCO7458FWD            | GGGCGACCGGTGGTCACTGGTGTAAACAGTCTTCTTATGATTCCGGGGATCCGTCGACC  | <i>rpfE</i> knockout                                    |
| SCO7458REV            | GTCAACCCGGCGCGCCGGGGCCGGTTTGGCACCGTCATGTAGGCTGGAGCTGCTTC     | <i>rpfE</i> knockout                                    |
| 7458 up               | ACAAGGAGGCGGTCCACG                                           | <i>rpfE</i> complementation and knockout confirmation   |
| 7458 down             | GTTGGTCGGCCTACTCGG                                           | <i>rpfE</i> complementation and knockout confirmation   |
| 7458 internal         | CGACATCCCCTGCAGACG                                           | <i>rpfE</i> knockout confirmation                       |
| SCO0974PP 5'          | CAGTACCATATGGCCGACGCGGACCTGGGAC                              | Overexpression of RpfD                                  |
| SCO0974PP 3'          | CAGTACGGATCCCTCAGATCCTGACGCCCGCCGGC                          | Overexpression of RpfD                                  |
| SCO3097PP 5'          | CAGTACCATATGGCCACCGCGTCCGAGTGGGAC                            | Overexpression of RpfA                                  |
| SCO3097PP 3'          | CGAAGTGGATCCCTTACTTTCAGGTGCAGCTGCTG                          | Overexpression of RpfA                                  |
| SCO3098PP 5'          | CAGTACCATATGGCCGACTCCACGAACCTGGGAC                           | Overexpression of RpfC                                  |
| SCO3098PP 3'          | CAGTACGGATCCCTACTTTTCGCCGATTCGCC                             | Overexpression of RpfC                                  |
| SCO3150ΔDUFPP5'       | CAGTACCATATGGCGACCGGCTTCCCGC                                 | Overexpression of RpfBΔDUF348                           |
| SCO3150PP 5'          | CAGTACCATATGGCCAAGGACAAGCGGTCGAG                             | Overexpression of RpfB                                  |
| SCO3150PP 3'          | CAGTACGGATCCCTCATTCGCCGACCGGGCGCC                            | Overexpression of RpfB                                  |
| SCO7458PP 5'          | CGAAGTCCATATGGCGCCCTCGGCGCC                                  | Overexpression of RpfE                                  |
| SCO7458PP 3'          | CGAAGTGGATCCCTCAGGCGCAGCCCC                                  | Overexpression of RpfE                                  |
| PrpfA-F               | GCACTGGATCCAAAAGTAGAGGGAGTTCGCG                              | Cloning of <i>rpfA</i> promoter                         |
| PrpfA-R               | GCACTGGTACCGAGCGGTTCATGACCGTAGAC                             | Cloning of <i>rpfA</i> promoter                         |
| SCO3152 pFlux Fwd     | TGATGAGGATCCCTCTGAGGGGATCCATAGGGC                            | Cloning of <i>SCO3152</i> promoter                      |
| SCO3152 pFlux Rev     | TGATGAGGTACCCACGGCGCTCTCACTCAT                               | Cloning of <i>SCO3152</i> promoter                      |
| SCO3098 pFlux Fwd     | TGATGAGGATCCGCATCCACTACTGCCTCGG                              | Cloning of <i>rpfC</i> promoter                         |
| SCO3098 pFlux Rev     | AAGAAGGGTACCGACGACCGTTCCCGGAGAG                              | Cloning of <i>rpfC</i> promoter                         |
| <i>rpfD</i> pFlux Fwd | TGATGAGGATCCCTTAGTGACCTTGGTGTCCG                             | Cloning of <i>rpfD</i> promoter                         |
| <i>rpfD</i> pFlux Rev | AAGAAGGGTACCCGGTTGATCCTGTTCGGCTG                             | Cloning of <i>rpfD</i> promoter                         |
| <i>rpfE</i> pFlux Fwd | TGATGAGGATCCCGTGTCCATCGTCTCCAC                               | Cloning of <i>rpfE</i> promoter                         |
| <i>rpfE</i> pFlux Rev | TGATGAGGTACCAAGAAGACTGTTACAGGTGAC                            | Cloning of <i>rpfE</i> promoter                         |
| ermEF-B               | GCACTGGATCCAGCCGACCCGAGCACGCGC                               | Cloning of <i>ermE*</i> promoter                        |
| ermER-K               | GCACTGGTACCGATCCTACCAACCCGGCACGA                             | Cloning of <i>ermE*</i> promoter                        |

**Table S3. Conditions for Rpf protein over expression and purification.**

| <b>Protein</b>       | <b>Size (kDa)*</b> | <b>[IPTG] (mM)</b> | <b>Induction time (h)</b> | <b>Induction temperature (°C)</b> | <b>[Imidazole] (mM) for elution</b> |
|----------------------|--------------------|--------------------|---------------------------|-----------------------------------|-------------------------------------|
| RpfA                 | 21.7               | 1                  | 2.5                       | 30                                | 250                                 |
| RpfB                 | 36.6               | 0.25               | 14                        | 16                                | 250                                 |
| RpfB $\Delta$ DUF348 | 21.5               | 0.25               | 14                        | 16                                | 250                                 |
| RpfC                 | 40.0               | 1                  | 14                        | 16                                | 150                                 |
| RpfD                 | 42.6               | 1                  | 14                        | 16                                | 70                                  |
| RpfE                 | 10.2               | 1                  | 2.5                       | 30                                | 250                                 |
| sIHF                 | 13.3               | 1                  | 14                        | 16                                | 250                                 |

\*Calculated excluding the signal peptide but including the 6  $\times$  His tag from pET15b.

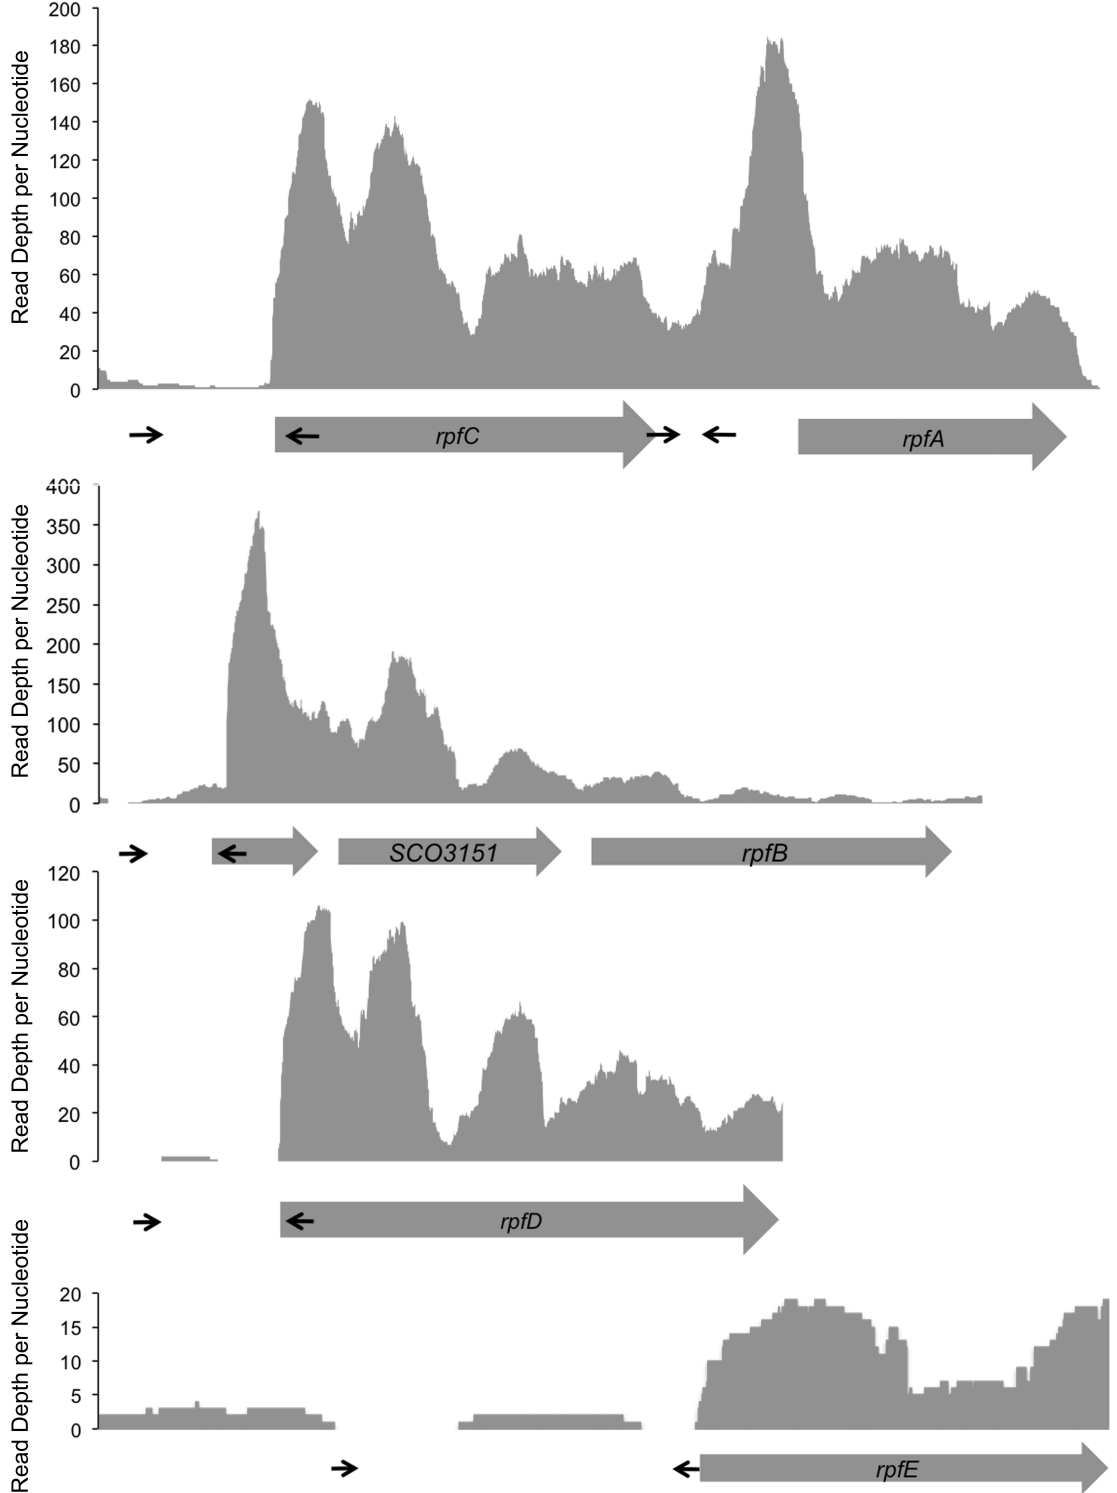

**Figure S1. Primer location for luciferase assays.** Primers for luciferase assays were positioned to amplify the promoter region for each *rpf* gene, based on previously published RNA sequencing data (Moody *et al.*, 2013). Graphs show the number of reads at each nucleotide for both the protein-coding sequence and region upstream of each *rpf*. Protein-coding sequences are indicated with grey arrows. Primer locations are indicated with black arrows.

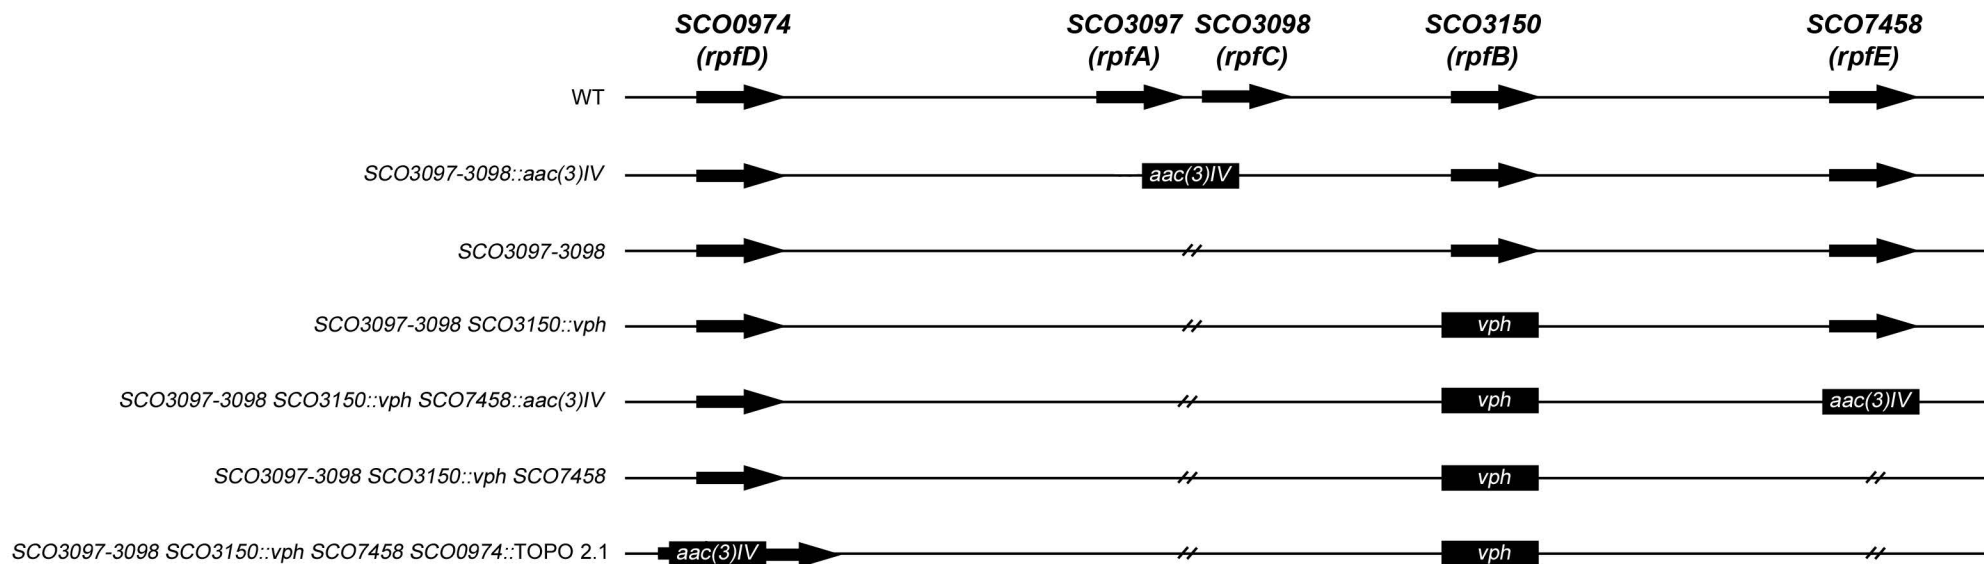

**Figure S2 . Construction of multiple *rpf* mutants.** *rpf* genes were replaced with antibiotic resistance cassettes in the order shown. Double diagonal lines represent ‘scar’ sequences left after removal of the antibiotic resistance cassettes. Abbreviations: *aac(3)IV*, apramycin resistance cassette; *vph*, viomycin resistance cassette.

```

SCO2326      1 GDSAEFQCFSKIVDHESDWNIHATNASSGAYGLV-QAL-----PGSKMASAGDDWKTN
SCO5029      1 -----NHESSWNYQAVNASSGAYGLF-QAL-----PAGKYASAGADWRTN
RpfB/SCO3150 1 ---ADHLNWQGLAACESGGRA-DAVDPSGTYGGLYQFDSATWHGLGGEGR---PEDASA-
RpfC/SCO3098 1 ---ADSTNWDQVAECETGGAW-SQNSGNGYYGGL-QLSQDAWEQYGGLDYAPSADQASR-
RpfE/SCO7458 1 --APLRIDWDAIAACESGNW-QANTGNGYYGGL-QFARSSWIAAGGLKYAPRADLATR-
RpfA/SCO3097 1 ---ATASEWDAVAQCESGGNW-SINTGNGYYGGL-QFSASTWAAAYGGTQYASTADQASK-
RpfD/SCO0974 1 ---ADAATWDKVAACESDQDDW-DINTGNGYYGGL-QFTQSTWEAFGGTRYAPRADLATR-
RpfB-Mtb     1 ---IDGSIWDAIAGCEAGGNW-AINTGNGYYGGV-QFDQGTWEANGGLRYAPRADLATR-

```

\*

\*\*

```

SCO2326      53 AATQIEWGLDYMKDRYGSTCDAWTFWQSNQWY-
SCO5029      40 PATQIKWGLSYMDNRYGSPCDAWAFWQANHWY-
RpfB/SCO3150 53 -AEQTYRAQ---KLYVRSQADAWPHCGARLRE-
RpfC/SCO3098 55 -SQQIRIAE---KIHASQGIAAWPTCGLLAGLG
RpfE/SCO7458 56 -GEQIAVAE---RLARLQGMSAWGCA-----
RpfA/SCO3097 55 -SQQIQIAE---KVLAQGKGAWPVCGTGLSGA
RpfD/SCO0974 55 -EQQIAGAE---KVLDTQGPGAWPVCSERAGL-
RpfB-Mtb     55 -EEQIAVAE---VTRLRQGWGAWPVCAARAGAR

```

\* Active site residues

\* Key cleft residues

**Figure S3.** Alignment of distantly related Rpf-like domains from SCO2326 and SCO5029 with RpfB from *Mycobacterium tuberculosis* and the more closely related Rpfs from *S. coelicolor*. Identical amino acid residues are highlighted in black, while similar residues indicated in grey. The red asterisk marks the key catalytic residue, while the blue asterisks mark important substrate-binding residues.

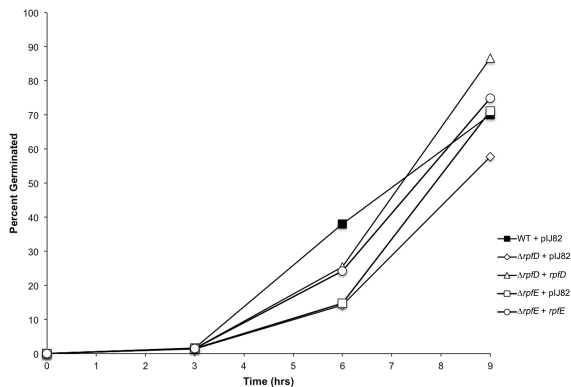

**Figure S4. Partial complementation of  $\Delta rpfD$  and  $\Delta rpfE$  confirmed by examining germination profiles.** Spores of complemented and vector alone-containing *rpf* mutants were plated on MS agar overlaid with cellophane discs. Spores were monitored for the presence or absence of germ tubes at the indicated time points. Data are representative of three independent trials (N > 100 per timepoint per strain). WT, wild type.

|                |     |         |                    |                   |               |               |
|----------------|-----|---------|--------------------|-------------------|---------------|---------------|
| S.venezuelae   | 41  | ADAA    | TWDRVAECESGGQWSANF | GNGMYGGLQFTQDS    | WERHGGLAYAPSP | DLASRAQQIAV   |
| S.clavuligerus | 41  | ADSA    | VWDRVAECESGGAWSADI | GNGYYGGLQMSQQT    | WEAYGGLEYASGP | DLASRSQQITV   |
| S.sp.S4        | 41  | ADTA    | TWDRVAECESGGAWS    | TNAGNGYYGGLQVTQEL | WERHGGLSYAP   | SADLASRSQQIVV |
| S.griseus      | 41  | AEAT    | TWDRVAECESGGMWSADL | GNGYYGGLQFSQET    | WSAYGGTAFAPR  | ADLASRSQQISV  |
| S.coelicolor   | 41  | ADST    | NWDOVAECETGGAWSQNS | GNGYYGGLQLSQDA    | WEQYGGLDYAP   | SADQASRSQQIRI |
| S.vermitilis   | 41  | ASGT    | TWDOVAECESGGFSWADI | GNGYYGGLQLSQGN    | WEKYGGLDYAP   | SADQASRSQQIAV |
| S.scabies      | 41  | ASGT    | TWDOVAECESGGFWSADI | GNGRYGGLQLTQAN    | WEKYGGLEYAKT  | ADLASRSQQIAV  |
|                |     |         | *                  |                   | **            |               |
|                |     |         |                    |                   |               |               |
| S.venezuelae   | 101 | AEKALA  | -KGSNDWATCAP       | IAGLT             |               |               |
| S.clavuligerus | 101 | AEKVLAA | ECAKAWASCAG        | MAGLA             |               |               |
| S.sp.S4        | 101 | AERILDA | EAGTAAWATCAP       | IAGLK             |               |               |
| S.griseus      | 101 | AEKVLDD | QGPKAWPSCA         | VISGLA            |               |               |
| S.coelicolor   | 101 | AEKTHAS | QGIAAWPTCGL        | IAGLG             |               |               |
| S.vermitilis   | 101 | AEKVLAA | KGSSPWSTCG         | IAGVLS            |               |               |
| S.scabies      | 101 | AEKVLAD | QGVGVWSTCGL        | IHNLG             |               |               |

**Figure S5. Alignment of the Rpf domain of RpfC orthologues from diverse *Streptomyces* species.** The key catalytic residue is indicated with a red asterisk, while important substrate-binding residues are marked with blue asterisks.
